# Supplementary material for: An Immunity-Triggering Effector from the Barley Smut Fungus Ustilago hordei Resides in an Ustilaginaceae-Specific Cluster Bearing Signs of Transposable Element-Assisted Evolution
Source: PubMed Central journal article supplement (PMC4081816; doi:10.1371/journal.ppat.1004223), 2014-07-03

Figure S7. Ali *et al.*

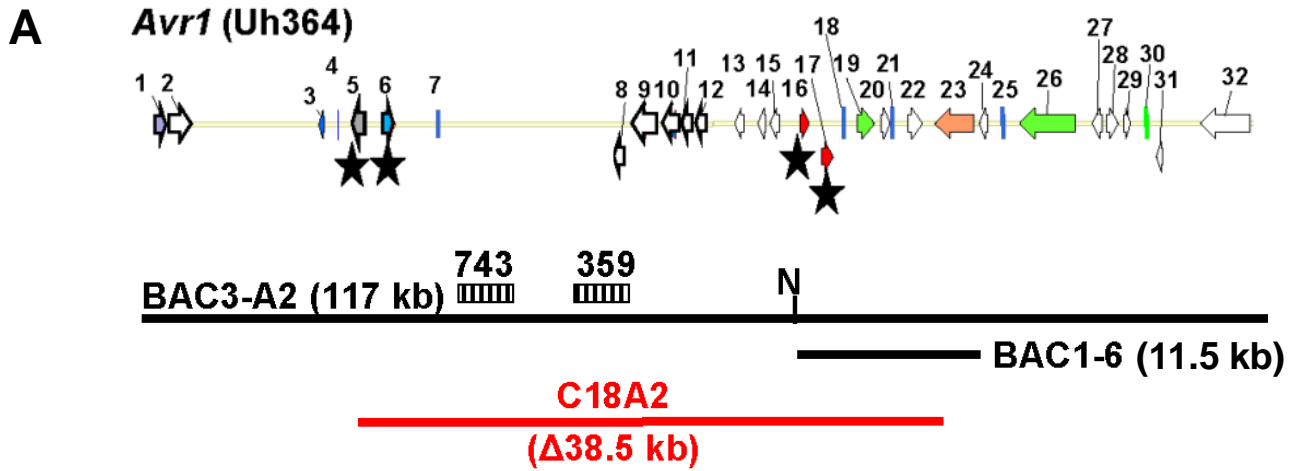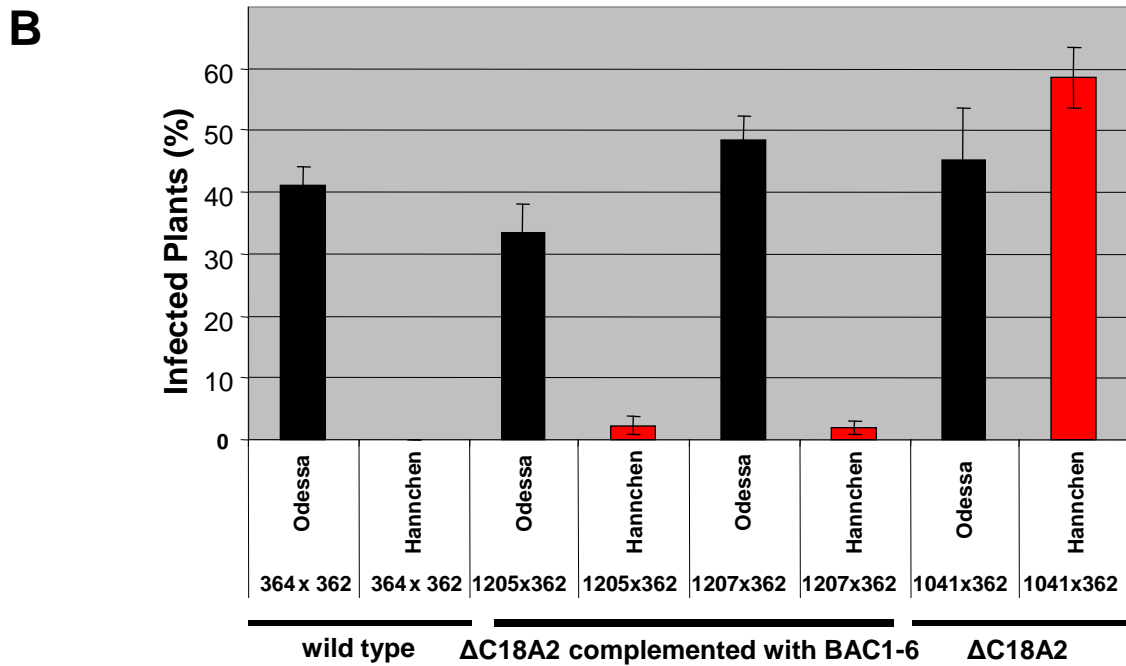

Supplement: ppat.1004223.s007.pdf [file ppat.1004223.s007.pdf]
