# Supplementary material for: An Immunity-Triggering Effector from the Barley Smut Fungus Ustilago hordei Resides in an Ustilaginaceae-Specific Cluster Bearing Signs of Transposable Element-Assisted Evolution
Source: PubMed Central journal article supplement (PMC4081816; doi:10.1371/journal.ppat.1004223), 2014-07-03
Supplement: ppat.1004223.s011.pdf [file ppat.1004223.s011.pdf]

**Table S1. *U. hordei* genes located on BAC3-A2 (117 kb) and their homologs in *U. maydis***

| Number <sup>1</sup> | <i>U. hordei</i><br>MIPS ID <sup>2</sup> | <i>U. maydis</i><br>homolog <sup>3</sup> | <i>Um</i><br>number <sup>4</sup> | E-Value <sup>5</sup> | Percent<br>Identity <sup>6</sup> | Percent<br>Similarity <sup>7</sup> | score/selfscore<br>ratio query <sup>8</sup> | Function <sup>9</sup>                                    |
|---------------------|------------------------------------------|------------------------------------------|----------------------------------|----------------------|----------------------------------|------------------------------------|---------------------------------------------|----------------------------------------------------------|
| 1                   | UHOR_08121                               | um05292                                  | 4                                | 0                    | 82.8                             | 94.4                               | 0.85                                        | related to DigA protein                                  |
| 2                   | UHOR_13886                               | um10151                                  |                                  | 2.1E-38              | 42.9                             | 63.9                               | 0.15                                        | hypothetical protein                                     |
| 3                   | UHOR_13887                               | no hit in<br>Um                          |                                  |                      |                                  |                                    |                                             | hypothetical protein                                     |
| 4                   | UHOR_13888                               | um04317                                  |                                  | 0.04                 | 36                               | 52                                 | 0.13                                        | hypothetical protein                                     |
| 5                   | <b>UHOR_08127</b>                        | <b>um04656</b>                           |                                  | 0.02                 | 26.4                             | 45.5                               | 0.06                                        | hypothetical protein *                                   |
| 6                   | <b>UHOR_08128</b>                        | <b>um05306</b>                           | 18                               | 1.5E-44              | 34.2                             | 62.6                               | 0.28                                        | conserved hypothetical Ustilaginaceae-specific protein * |
| 7                   | UHOR_13890                               | um00543                                  |                                  | 0.01                 | 36.4                             | 56.8                               | 0.14                                        | hypothetical protein                                     |
| 8                   | UHOR_10014                               | um02565                                  |                                  | 0                    | 62.4                             | 88.6                               | 0.54                                        | conserved hypothetical protein                           |
| 9                   | UHOR_10015                               | um12288                                  |                                  | 0                    | 33.5                             | 56.3                               | 0.29                                        | conserved hypothetical protein                           |
| 10                  | UHOR_10016                               | um02285                                  |                                  | 4.6E-05              | 20.3                             | 54.2                               | 0.05                                        | hypothetical protein                                     |
| 11                  | UHOR_13893                               | um11726                                  |                                  | 0.01                 | 25                               | 52                                 | 0.1                                         | hypothetical protein                                     |
| 12                  | UHOR_10017                               | um02745                                  |                                  | 2.4E-16              | 30.6                             | 57.5                               | 0.23                                        | conserved hypothetical protein                           |
| 13                  | UHOR_10018                               | um00776                                  |                                  | 6E-18                | 46.1                             | 68.5                               | 0.18                                        | conserved hypothetical Ustilaginaceae-specific protein   |
| 14                  | UHOR_10019                               | um06249                                  |                                  | 8.8E-05              | 25.3                             | 53.2                               | 0.11                                        | hypothetical protein                                     |
| 15                  | UHOR_10020                               | um02747                                  |                                  | 4E-12                | 25.8                             | 60.3                               | 0.14                                        | conserved hypothetical protein                           |
| 16                  | <b>UHOR_10021</b>                        | <b>um05294</b>                           | 6                                | 2.3E-15              | 27.8                             | 59.3                               | 0.17                                        | conserved hypothetical Ustilaginaceae-specific protein * |
|                     |                                          | <b>um10554</b>                           | 10                               | 3.0E-14              | 26.1                             | 61.1                               | 0.16                                        |                                                          |
|                     |                                          | <b>um05295</b>                           | 7                                | 3.8E-12              | 23.8                             | 57.9                               | 0.15                                        |                                                          |
|                     |                                          | <b>um12302</b>                           | 8                                | 2.6E-11              | 25                               | 58.7                               | 0.14                                        |                                                          |
|                     |                                          | <b>um10553</b>                           | 9                                | 1.8E-04              | 22.3                             | 54.2                               | 0.09                                        |                                                          |

|    |                   |                                  |    |         |      |      |      |                                                                       |
|----|-------------------|----------------------------------|----|---------|------|------|------|-----------------------------------------------------------------------|
| 17 | <b>UHOR_10022</b> | <b>um12302</b><br><b>um05295</b> | 8  | 1.9E-16 | 30.5 | 65.2 | 0.18 | conserved hypothetical Ustilaginaceae-specific protein, UhAvr1 *      |
|    |                   |                                  | 7  | 2.7E-15 | 29.5 | 60.4 | 0.17 |                                                                       |
| 18 | UHOR_13899        | no hit in Um                     |    |         |      |      |      | hypothetical protein                                                  |
| 19 | UHOR_10023        | um04172                          |    | 0.0007  | 18.7 | 56   | 0.05 | probable transposase                                                  |
| 20 | UHOR_10024        | um03280                          |    | 0.0003  | 29.4 | 51   | 0.09 | hypothetical protein                                                  |
| 21 | UHOR_13901        | no hit in Um                     |    |         |      |      |      | <i>U. hordei</i> -specific protein (no proper gene call / truncated?) |
| 22 | UHOR_10025        | um06075                          |    | 0.008   | 27   | 57   | 0.05 | probable transposase                                                  |
| 23 | UHOR_08123        | um05293                          | 5  | 0       | 91.6 | 97.2 | 0.9  | probable oligosaccharyltransferase                                    |
| 24 | UHOR_13903        | no hit in Um                     |    |         |      |      |      | hypothetical protein                                                  |
| 25 | UHOR_13904        | no hit in Um                     |    |         |      |      |      | hypothetical protein                                                  |
| 26 | UHOR_10026        | um04367                          |    | 0       | 58.3 | 75.4 | 0.12 | related to Gag-pol polyprotein                                        |
| 27 | UHOR_10027        | um10618                          |    | 1.1E-11 | 32.9 | 71.4 | 0.12 | hypothetical protein                                                  |
| 28 | UHOR_10028        | um02565                          |    | 0       | 63   | 87.3 | 0.49 | conserved hypothetical protein                                        |
| 29 | UHOR_13907        | no hit in Um                     |    |         |      |      |      | hypothetical protein                                                  |
| 30 | UHOR_10029        | no hit in Um                     |    |         |      |      |      | hypothetical protein                                                  |
| 31 | UHOR_10030        | um05274                          |    | 0.02    | 31.2 | 64.1 | 0.1  | hypothetical protein                                                  |
| 32 | UHOR_10031        | um02565                          |    | 0       | 46.1 | 63   | 0.12 | related to retrotransposon protein                                    |
| 33 | <b>UHOR_08130</b> | <b>um05311</b>                   | 23 | 5.9E-21 | 36.8 | 67.2 | 0.21 | conserved hypothetical Ustilaginaceae-specific protein *              |
|    |                   | <b>um05309</b>                   | 21 | 2.4E-10 | 25.6 | 60.6 | 0.13 |                                                                       |
|    |                   | <b>um05310</b>                   | 22 | 8.1E-10 | 26.8 | 64.3 | 0.13 |                                                                       |
| 34 | <b>UHOR_08132</b> | <b>um05311</b>                   | 23 | 2.0E-21 | 33.1 | 64.5 | 0.24 | conserved hypothetical Ustilaginaceae-specific protein *              |
|    |                   | <b>um05310</b>                   | 22 | 1.9E-13 | 30.6 | 61.8 | 0.17 |                                                                       |
|    |                   | <b>um05309</b>                   | 21 | 4.4E-12 | 26.4 | 68.0 | 0.16 |                                                                       |

|    |            |                    |    |         |      |      |      |                                                              |
|----|------------|--------------------|----|---------|------|------|------|--------------------------------------------------------------|
| 35 | UHOR_08134 | um05312            | 24 | 2.3E-43 | 45.8 | 74.8 | 0.38 | conserved hypothetical Ustilaginaceae-specific protein *     |
|    |            | um05317            | 29 | 2.9E-14 | 25.7 | 60.3 | 0.16 |                                                              |
|    |            | um10557            | 27 | 6.8E-11 | 28.6 | 59.7 | 0.14 |                                                              |
|    |            | um05318            | 30 | 2.9E-10 | 26.8 | 58.5 | 0.13 |                                                              |
|    |            | um05314            | 26 | 5.3E-09 | 25.2 | 63.1 | 0.12 |                                                              |
| 36 | UHOR_10032 | um04367            |    | 0       | 57.9 | 75.4 | 0.08 | related to pol protein                                       |
| 37 | UHOR_13915 | no hit in Um       |    |         |      |      |      | hypothetical protein                                         |
| 38 | UHOR_13916 | um05318            | 30 | 2.0E-08 | 58.3 | 83.3 | 0.28 | hypothetical protein *                                       |
| 39 | UHOR_10033 | um05319            | 31 | 4.2E-13 | 36.7 | 65.1 | 0.28 | conserved hypothetical Ustilaginaceae-specific protein *     |
| 40 | UHOR_08135 | um10558<br>um05320 | 32 | 4.9E-30 | 93.2 | 96.8 | 0.93 | probable tubulin beta chain                                  |
| 41 | UHOR_08136 | um02237            |    | 0       | 26.7 | 53.9 | 0.13 | conserved hypothetical protein                               |
| 42 | UHOR_08137 | um10560            | 35 | 0       | 49.1 | 73.3 | 0.4  | conserved hypothetical protein                               |
| 43 | UHOR_08138 | um10561            | 36 | 0       | 81.6 | 93.4 | 0.84 | related to VPS10 domain-containing receptor SorCS1 precursor |
| 44 | UHOR_08139 | um03753            |    | 8.7E-19 | 23.4 | 55.7 | 0.13 | conserved hypothetical Ustilaginaceae-specific protein *     |
|    |            | um03752            |    | 2.2E-14 | 25.2 | 52.7 | 0.11 |                                                              |
| 45 | UHOR_13921 | no hit in Um       |    |         |      |      |      | hypothetical protein                                         |
| 46 | UHOR_13922 | um05325            | 37 | 0       | 64.9 | 78.4 | 0.66 | conserved hypothetical protein                               |
| 47 | UHOR_13925 | um05326            | 38 | 0       | 54.3 | 72   | 0.5  | conserved hypothetical protein                               |

<sup>1</sup> Number corresponds to predicted genes in the figures

<sup>2</sup> MIPS *U. hordei* strain Uh364 (*MAT-1*) Database gene ID number available at <http://www.helmholtz-muenchen.de/en/ibis/institute/groups/fungal-microbial-genomics/resources/muhdb/index.html>; color indicates homology / likely family members, and corresponds to Figure 3

<sup>3</sup> Best hits against MIPS *U. maydis* Database: gene ID number (alternate) available at <http://www.helmholtz-muenchen.de/en/ibis/institute/groups/fungal-microbial-genomics/resources/mumdb/index.html>

<sup>4</sup> arbitrary number given to the corresponding *U. maydis* gene in the Figures

<sup>5</sup> reported expect value based on BLASTp [101]

<sup>6</sup> percent identical amino acids over the length of the matching protein sequences

<sup>7</sup> percent similar amino acids over the length of the matching protein sequences

<sup>8</sup> SIMAP results of the best hit; SIMAP is a program that measures protein similarity based on identities of amino acids in homologous fragments multiplied by the length of the homologous region and divided by the protein length [46]

<sup>9</sup> annotated function of *U. hordei* gene; predicted SSPs indicated with an asterisk

46. Rattei T, Arnold R, Tischler P, Lindner D, Stumpflen V, et al. (2006) SIMAP: the similarity matrix of proteins. *Nucleic Acids Res* 34: D252-256.
101. Altschul SF, Gish W, Miller W, Myers EW, Lipman DJ (1990) Basic local alignment search tool. *J Mol Biol* 215: 403-410.
