# Supplementary material for: An Immunity-Triggering Effector from the Barley Smut Fungus Ustilago hordei Resides in an Ustilaginaceae-Specific Cluster Bearing Signs of Transposable Element-Assisted Evolution
Source: PubMed Central journal article supplement (PMC4081816; doi:10.1371/journal.ppat.1004223), 2014-07-03
Supplement: ppat.1004223.s012.pdf [file ppat.1004223.s012.pdf]

**Table S2. Strains used in this work**

| Strain ID | Relevant Genotype                                                           | Comment / Source or origin                                                                                                                                        |
|-----------|-----------------------------------------------------------------------------|-------------------------------------------------------------------------------------------------------------------------------------------------------------------|
| Uh359     | <i>MAT-1 Uhavr1</i>                                                         | wild type, alias Uh4854-4, virulent on cv. Hannchen [38]                                                                                                          |
| Uh362     | <i>MAT-2 Uhavr1</i>                                                         | wild type, alias Uh4854-10, virulent on cv. Hannchen [38]                                                                                                         |
| Uh364     | <i>MAT-1 UhAvr1</i>                                                         | wild type, alias Uh4857-4, avirulent on cv. Hannchen [38]                                                                                                         |
| Uh365     | <i>MAT-2 UhAvr1</i>                                                         | wild type, alias Uh 4857-5, avirulent on cv. Hannchen [38]                                                                                                        |
| Um324     | <i>a2b2</i>                                                                 | wild type; Um521 [102]                                                                                                                                            |
| Uh951     | Uh364 ( <i>MAT-1, ΔUHOR_08134</i> ); hyg <sup>R</sup>                       | this work                                                                                                                                                         |
| Uh1041    | Uh364 ( <i>MAT-1, Δ18A2</i> ); cbx <sup>R</sup>                             | deletion of fragment 18A2 (see Figure 1); this work                                                                                                               |
| Uh1046    | Uh364 ( <i>MAT-1, Δ18A3</i> ); cbx <sup>R</sup>                             | deletion of fragment 18A3 (see Figure 1); this work                                                                                                               |
| Uh1051    | Uh364 ( <i>MAT-1, 18A4</i> ); cbx <sup>R</sup>                              | deletion of fragment 18A4 (see Figure 1); this work                                                                                                               |
| Uh1116    | <i>MAT-2, Δ18A2 (31)</i> ; cbx <sup>R</sup>                                 | progeny #31 ( <i>MAT-2</i> ) of cross Uh362xUh1041; this work                                                                                                     |
| Uh1117    | <i>MAT-2, Δ18A2 (33)</i> ; cbx <sup>R</sup>                                 | progeny #33 ( <i>MAT-2</i> ) of cross Uh362xUh1041; this work                                                                                                     |
| Uh1118    | <i>MAT-2, Δ18A2 (35)</i> ; cbx <sup>R</sup>                                 | progeny #35 ( <i>MAT-2</i> ) of cross Uh362xUh1041; this work                                                                                                     |
| Uh1131    | Uh364 ( <i>MAT-1, Δ18A2-b</i> ); cbx <sup>R</sup>                           | deletion of fragment 18A2-b, clone 52 (see Figure 1); this work                                                                                                   |
| Uh1137    | Uh364 ( <i>MAT-1, Δ18A2-c</i> ); cbx <sup>R</sup>                           | deletion of fragment 18A2-c, clone 19 (see Figure 1); this work                                                                                                   |
| Uh1142    | Uh364 ( <i>MAT-1, Δ18A2-c</i> ); cbx <sup>R</sup>                           | deletion of fragment 18A2-c, clone 59 (see Figure 1); this work                                                                                                   |
| Uh1149    | Uh364 ( <i>MAT-1, Δ18A2-d</i> ); cbx <sup>R</sup>                           | deletion of fragment 18A2-d, clone 1 (see Figure 1); this work                                                                                                    |
| Uh1155    | Uh364 ( <i>MAT-1, Δ18A2-d</i> ); cbx <sup>R</sup>                           | deletion of fragment 18A2-d, clone 82 (see Figure 1); this work                                                                                                   |
| Uh1166    | Uh364 ( <i>MAT-1, Δ18A2-a</i> ); cbx <sup>R</sup>                           | deletion of fragment 18A2-a, clone 76 (see Figure 1); this work                                                                                                   |
| Uh1173    | Uh364 ( <i>MAT-1, Δ18A2-a</i> ); cbx <sup>R</sup>                           | deletion of fragment 18A2-a, clone 316 (see Figure 1); this work                                                                                                  |
| Uh1189    | Uh364 ( <i>MAT-1, Δ18A2-e</i> ); cbx <sup>R</sup>                           | deletion of fragment 18A2-e, clone 64 (see Figure 1); this work                                                                                                   |
| Uh1197    | Uh364 ( <i>MAT-1, Δ18A2-e</i> ); cbx <sup>R</sup>                           | deletion of fragment 18A2-e, clone 109 (see Figure 1); this work                                                                                                  |
| Uh1205    | Uh1041 [BAC1-6]; cbx <sup>R</sup> hyg <sup>R</sup>                          | BAC clone pBAC1-6 (Figure 1A) randomly integrated, clone 2; this work                                                                                             |
| Uh1207    | Uh1041 [BAC1-6]; cbx <sup>R</sup> hyg <sup>R</sup>                          | BAC clone pBAC1-6 (Figure 1A) randomly integrated; clone 8; this work                                                                                             |
| Uh1250    | Uh1041 [HSP70: <i>UHOR_10021:HA</i> ]; cbx <sup>R</sup> zeo <sup>R</sup>    | complemented with randomly integrated effector UHOR_10021:C-terminal HA tag, expressed from constitutive HSP70 promoter, clone 3; this work                       |
| Uh1251    | Uh1041 [HSP70: <i>UHOR_10021:HA</i> ]; cbx <sup>R</sup> zeo <sup>R</sup>    | complemented with randomly integrated effector UHOR_10021:C-terminal HA tag, expressed from constitutive HSP70 promoter, clone 4; this work                       |
| Uh1253    | Uh1041 [HSP70: <i>UHOR_10021-SP:HA</i> ]; cbx <sup>R</sup> zeo <sup>R</sup> | complemented with randomly integrated effector UHOR_10021:C-terminal HA tag, minus signal peptide, expressed from constitutive HSP70 promoter, clone 2; this work |
| Uh1254    | Uh1041 [HSP70: <i>UHOR_10021-SP:HA</i> ]; zeo <sup>R</sup>                  | complemented with randomly integrated effector UHOR_10021:C-terminal HA tag, minus signal peptide, expressed from constitutive HSP70 promoter, clone 3; this work |
| Uh1255    | Uh1041 [HSP70: <i>UhAvr1:HA</i> ]; cbx <sup>R</sup> zeo <sup>R</sup>        | complemented with randomly integrated effector UHOR_10022:C-terminal HA tag, expressed from constitutive HSP70 promoter, clone 1; this work                       |
| Uh1256    | Uh1041 [HSP70: <i>UhAvr1:HA</i> ]; cbx <sup>R</sup> zeo <sup>R</sup>        | complemented with randomly integrated effector UHOR_10022:C-terminal                                                                                              |

| Strain ID | Relevant Genotype                                                             | Comment / Source or origin                                                                                                                                                                                                               |
|-----------|-------------------------------------------------------------------------------|------------------------------------------------------------------------------------------------------------------------------------------------------------------------------------------------------------------------------------------|
| Uh1257    | Uh1041 [HSP70: <i>UhAvr1</i> -SP:HA]; cbx <sup>R</sup> zeo <sup>R</sup>       | HA tag, expressed from constitutive HSP70 promoter, clone 4; this work complemented with randomly integrated effector UHOR_10022:C-terminal HA tag, minus signal peptide, expressed from constitutive HSP70 promoter, clone 4; this work |
| Uh1258    | Uh1041 [HSP70: <i>UhAvr1</i> -SP:HA]; cbx <sup>R</sup> zeo <sup>R</sup>       | complemented with randomly integrated effector UHOR_10022:C-terminal HA tag, minus signal peptide, expressed from constitutive HSP70 promoter, clone 6; this work                                                                        |
| Uh1289    | Uh364 ( <i>MAT-1</i> , $\Delta$ <i>UhAvr1</i> ); cbx <sup>R</sup>             | single <i>UhAvr1</i> deletion, clone 37; this work                                                                                                                                                                                       |
| Uh1297    | Uh364 ( <i>MAT-1</i> , $\Delta$ <i>UhAvr1</i> ); cbx <sup>R</sup>             | single <i>UhAvr1</i> deletion, clone 106; this work                                                                                                                                                                                      |
| Uh1351    | Uh364 ( <i>MAT-1</i> , <i>Avr1</i> [otef: <i>gfp</i> ]); zeo <sup>R</sup>     | GFP expressed from strong constitutive <i>Ustilago</i> otef promoter; this work                                                                                                                                                          |
| Uh1353    | Uh1289 [ <i>UhAvr1</i> : <i>gfp</i> ]; zeo <sup>R</sup>                       | $\Delta$ <i>UhAvr1</i> , replacing deletion by UHOR_10022:GFP chimer, clone 2; this work                                                                                                                                                 |
| Uh1354    | Uh1289 [ <i>UhAvr1</i> : <i>gfp</i> ]; zeo <sup>R</sup>                       | $\Delta$ <i>UhAvr1</i> , replacing deletion by UHOR_10022:GFP chimer, clone 3; this work                                                                                                                                                 |
| Uh1355    | Uh1289 [ <i>UhAvr1</i> : <i>gfp</i> ]; zeo <sup>R</sup>                       | $\Delta$ <i>UhAvr1</i> , replacing deletion by UHOR_10022:GFP chimer, clone 4; this work                                                                                                                                                 |
| Uh1357    | Uh1289 [otef: <i>UhAvr1</i> : <i>gfp</i> ]; zeo <sup>R</sup> cbx <sup>R</sup> | $\Delta$ <i>UhAvr1</i> , randomly integrated effector UHOR_10022:GFP chimer driven from strong otef promoter, clone 1; this work                                                                                                         |
| Uh1358    | Uh1289 [otef: <i>UhAvr1</i> : <i>gfp</i> ]; zeo <sup>R</sup> cbx <sup>R</sup> | $\Delta$ <i>UhAvr1</i> , randomly integrated effector UHOR_10022:GFP chimer driven from strong otef promoter, clone 2; this work                                                                                                         |
| Uh1359    | Uh1289 [otef: <i>UhAvr1</i> : <i>gfp</i> ]; zeo <sup>R</sup> cbx <sup>R</sup> | $\Delta$ <i>UhAvr1</i> , randomly integrated effector UHOR_10022:GFP chimer driven from strong otef promoter, clone 3; this work                                                                                                         |
| Uh1361    | Uh1289 [HSP70: <i>UhAvr1</i> :HA]; zeo <sup>R</sup> cbx <sup>R</sup>          | $\Delta$ <i>UhAvr1</i> , randomly integrated effector UHOR_10022:C-terminal HA tag chimer, driven from strong HSP70 promoter, clone 1; this work                                                                                         |
| Uh1362    | Uh1289 [HSP70: <i>UhAvr1</i> :HA]; zeo <sup>R</sup> cbx <sup>R</sup>          | $\Delta$ <i>UhAvr1</i> , randomly integrated effector UHOR_10022:C-terminal HA tag chimer, driven from strong HSP70 promoter, clone 2; this work                                                                                         |
| Uh1363    | Uh1289 [HSP70: <i>UhAvr1</i> -SP:HA]; zeo <sup>R</sup> cbx <sup>R</sup>       | $\Delta$ <i>UhAvr1</i> , randomly integrated effector UHOR_10022:C-terminal HA tag chimer minus SP, driven from strong HSP70 promoter, clone 1; this work                                                                                |
| Uh1369    | Uh1289 [HSP70: <i>UhAvr1</i> ]1; zeo <sup>R</sup> cbx <sup>R</sup>            | $\Delta$ <i>UhAvr1</i> , randomly integrated wild type effector UHOR_10022 ORF, driven from strong HSP70 promoter, clone 1; this work                                                                                                    |
| Uh1370    | Uh1289 [HSP70: <i>UhAvr1</i> ]4; zeo <sup>R</sup> cbx <sup>R</sup>            | $\Delta$ <i>UhAvr1</i> , randomly integrated wild type effector UHOR_10022 ORF, driven from strong HSP70 promoter, clone 4; this work                                                                                                    |
| Uh1371    | Uh1289 [HSP70: <i>UhAvr1</i> ]9; zeo <sup>R</sup> cbx <sup>R</sup>            | $\Delta$ <i>UhAvr1</i> , randomly integrated wild type effector UHOR_10022 ORF, driven from strong HSP70 promoter, clone 9; this work                                                                                                    |
| Uh1372    | Uh1289 [complete <i>UhAvr1</i> gene]1; zeo <sup>R</sup> cbx <sup>R</sup>      | $\Delta$ <i>UhAvr1</i> , randomly integrated complete wild type effector UHOR_10022 gene; transformant 1; this work                                                                                                                      |
| Uh1373    | Uh1289 [complete <i>UhAvr1</i> gene]2; zeo <sup>R</sup> cbx <sup>R</sup>      | $\Delta$ <i>UhAvr1</i> , randomly integrated complete wild type effector UHOR_10022 gene; transformant 2; this work                                                                                                                      |

| Strain ID                        | Relevant Genotype                                                                     | Comment / Source or origin                                                                                          |
|----------------------------------|---------------------------------------------------------------------------------------|---------------------------------------------------------------------------------------------------------------------|
| Uh1374                           | Uh1289 [complete <i>UhAvr1</i> gene] <sup>3</sup> ; zeo <sup>R</sup> cbx <sup>R</sup> | $\Delta$ <i>UhAvr1</i> , randomly integrated complete wild type effector UHOR_10022 gene; transformant 3; this work |
| <b>World-wide field isolates</b> |                                                                                       |                                                                                                                     |
| Uh795                            | <i>MAT-1 UhAvr1</i>                                                                   | unknown                                                                                                             |
| Uh798                            | <i>MAT-2 UhAvr1</i>                                                                   | unknown                                                                                                             |
| Uh805                            | <i>MAT-1 Uhavr1</i>                                                                   | Kenya                                                                                                               |
| Uh811                            | <i>MAT-1 Uhavr1</i>                                                                   | Ethiopia                                                                                                            |
| Uh813                            | <i>MAT-1 UhAvr1</i>                                                                   | Iran                                                                                                                |
| Uh815                            | <i>MAT-2 Uhavr1</i>                                                                   | Canary Island                                                                                                       |
| Uh818                            | <i>MAT-1 Uhavr1</i>                                                                   | Spain                                                                                                               |
| Uh820                            | <i>MAT-2 Uhavr1</i>                                                                   | Tunisia                                                                                                             |
| Uh822                            | <i>MAT-1 Uhavr1</i>                                                                   | Canada                                                                                                              |
| Uh1273                           | <i>MAT-1 UhAvr1</i>                                                                   | ICARDA Azerbaijan                                                                                                   |
| Uh1278                           | <i>MAT-1 Uhavr1</i>                                                                   | Hama Hamra, Syria                                                                                                   |
| Uh1283                           | <i>MAT-1 UhAvr1</i>                                                                   | Turkey                                                                                                              |
| Uh2001-246                       | <i>MAT-1 Uhavr1</i>                                                                   | Turkey                                                                                                              |

Uh, *U. hordei*; Um, *U. maydis*. All mutants were generated in the Uh364 background. R, resistant to the indicated antibiotic: hyg, hygromycin B; zeo, zeomycin / zeocin; cbx, carboxin; integrative complementing plasmids are in between square brackets.  $\Delta$ , deletion mutant, indicating specific gene or region.

38. Linning R, Lin D, Lee N, Abdennadher M, Gaudet D, et al. (2004) Marker-based cloning of the region containing the *UhAvr1* avirulence gene from the basidiomycete barley pathogen *Ustilago hordei*. *Genetics* 166: 99-111.
102. Kronstad JW, Leong SA (1989) Isolation of two alleles of the b locus of *Ustilago maydis*. *Proc Natl Acad Sci U S A* 86: 978-982.
