# Supplementary material for: An Immunity-Triggering Effector from the Barley Smut Fungus Ustilago hordei Resides in an Ustilaginaceae-Specific Cluster Bearing Signs of Transposable Element-Assisted Evolution
Source: PubMed Central journal article supplement (PMC4081816; doi:10.1371/journal.ppat.1004223), 2014-07-03
Supplement: ppat.1004223.s013.pdf [file ppat.1004223.s013.pdf]

**Table S3. Pathogenicity data of *U. hordei* controls, deletion mutants and complementing transformants.**

| cross | Strains <sup>1</sup>                                                                                     | barley cv | # plants diseased <sup>2</sup> | plants inoculated | %      |
|-------|----------------------------------------------------------------------------------------------------------|-----------|--------------------------------|-------------------|--------|
| 1     | Uh359 ( <i>MAT-1, Uhavr1</i> ) x Uh362 ( <i>MAT-2, Uhavr1</i> )                                          | Odessa    | 6                              | 36                | 17     |
| 1     | Uh359 ( <i>MAT-1, Uhavr1</i> ) x Uh362 ( <i>MAT-2, Uhavr1</i> )                                          | Hannchen  | 8                              | 40                | 20     |
| 2     | Uh362 ( <i>MAT-2, Uhavr1</i> ) x Uh364 ( <i>MAT-1, UhAvr1</i> )                                          | Odessa    | 22, 7                          | 54, 32            | 41, 22 |
| 2     | Uh362 ( <i>MAT-2, Uhavr1</i> ) x Uh364 ( <i>MAT-1, UhAvr1</i> )                                          | Hannchen  | 0, 0                           | 59, 32            | 0, 0   |
| 3     | Uh362 ( <i>MAT-2, Uhavr1</i> ) x U1041 = Uh364 ( <i>MAT-1, Δ18A2</i> )                                   | Odessa    | 3                              | 43                | 7      |
| 3     | Uh362 ( <i>MAT-2, Uhavr1</i> ) x U1041 = Uh364 ( <i>MAT-1, Δ18A2</i> )                                   | Hannchen  | 12                             | 34                | 35     |
| 4     | Uh362 ( <i>MAT-2, Uhavr1</i> ) x Uh1255 = Uh1041 ( <i>Δ18A2</i> [HSP70: <i>UhAvr1:HA</i> ])1             | Odessa    | 7                              | 79                | 9      |
| 4     | Uh362 ( <i>MAT-2, Uhavr1</i> ) x Uh1255 = Uh1041 ( <i>Δ18A2</i> [HSP70: <i>UhAvr1:HA</i> ])1             | Hannchen  | 14                             | 69                | 20     |
| 5     | Uh362 ( <i>MAT-2, Uhavr1</i> ) x Uh1256 = Uh1041 ( <i>Δ18A2</i> , [HSP70: <i>UhAvr1:HA</i> ])4           | Odessa    | 18                             | 74                | 24     |
| 5     | Uh362 ( <i>MAT-2, Uhavr1</i> ) x Uh1256 = Uh1041 ( <i>Δ18A2</i> , [HSP70: <i>UhAvr1:HA</i> ])4           | Hannchen  | 12                             | 62                | 19     |
| 6     | Uh362 ( <i>MAT-2, Uhavr1</i> ) x Uh1289 = Uh364 ( <i>MAT-1, ΔUhAvr1</i> )                                | Odessa    | 25, 14                         | 40, 33            | 63, 42 |
| 6     | Uh362 ( <i>MAT-2, Uhavr1</i> ) x Uh1289 = Uh364 ( <i>MAT-1, ΔUhAvr1</i> )                                | Hannchen  | 26, 12                         | 56, 33            | 46, 36 |
| 7     | Uh362 ( <i>MAT-2, Uhavr1</i> ) x Uh1353 = Uh1289 ( <i>MAT-1, ΔUhAvr1</i> [UHOR_10022:GFP])2              | Odessa    | 6                              | 55                | 11     |
| 7     | Uh362 ( <i>MAT-2, Uhavr1</i> ) x Uh1353 = Uh1289 ( <i>MAT-1, ΔUhAvr1</i> [UHOR_10022:GFP])2              | Hannchen  | 13                             | 56                | 23     |
| 8     | Uh362 ( <i>MAT-2, Uhavr1</i> ) x Uh1354 = Uh1289 ( <i>MAT-1, ΔUhAvr1</i> [UHOR_10022:GFP])3              | Odessa    | 24                             | 41                | 59     |
| 8     | Uh362 ( <i>MAT-2, Uhavr1</i> ) x Uh1354 = Uh1289 ( <i>MAT-1, ΔUhAvr1</i> [UHOR_10022:GFP])3              | Hannchen  | 16                             | 57                | 28     |
| 9     | Uh362 ( <i>MAT-2, Uhavr1</i> ) x Uh1355 = Uh1289 ( <i>MAT-1, ΔUhAvr1</i> [UHOR_10022:GFP])4              | Odessa    | 13                             | 40                | 33     |
| 9     | Uh362 ( <i>MAT-2, Uhavr1</i> ) x Uh1355 = Uh1289 ( <i>MAT-1, ΔUhAvr1</i> [UHOR_10022:GFP])4              | Hannchen  | 7                              | 37                | 19     |
| 10    | Uh362 ( <i>MAT-2, Uhavr1</i> ) x Uh1372 = Uh1289 ( <i>MAT-1, ΔUhAvr1</i> [complete <i>UhAvr1</i> gene])1 | Odessa    | 6                              | 32                | 19     |
| 10    | Uh362 ( <i>MAT-2, Uhavr1</i> ) x Uh1372 = Uh1289 ( <i>MAT-1, ΔUhAvr1</i> [complete <i>UhAvr1</i> gene])1 | Hannchen  | 0                              | 34                | 0      |
| 11    | Uh362 ( <i>MAT-2, Uhavr1</i> ) x Uh1373 = Uh1289 ( <i>MAT-1, ΔUhAvr1</i> [complete <i>UhAvr1</i> gene])2 | Odessa    | 14                             | 35                | 40     |
| 11    | Uh362 ( <i>MAT-2, Uhavr1</i> ) x Uh1373 = Uh1289 ( <i>MAT-1, ΔUhAvr1</i> [complete <i>UhAvr1</i> gene])2 | Hannchen  | 0                              | 31                | 0      |
| 12    | Uh362 ( <i>MAT-2, Uhavr1</i> ) x Uh1374 = Uh1289 ( <i>MAT-1, ΔUhAvr1</i> [complete <i>UhAvr1</i> gene])3 | Odessa    | 9                              | 34                | 26     |
| 12    | Uh362 ( <i>MAT-2, Uhavr1</i> ) x Uh1374 = Uh1289 ( <i>MAT-1, ΔUhAvr1</i> [complete <i>UhAvr1</i> gene])3 | Hannchen  | 0                              | 32                | 0      |
| 13    | Uh362 ( <i>MAT-2, Uhavr1</i> ) x Uh1357 = Uh1289 ( <i>MAT-1, ΔUhAvr1</i> [otef: <i>UhAvr1:GFP</i> ])1    | Odessa    | 9                              | 33                | 27     |
| 13    | Uh362 ( <i>MAT-2, Uhavr1</i> ) x Uh1357 = Uh1289 ( <i>MAT-1, ΔUhAvr1</i> [otef: <i>UhAvr1:GFP</i> ])1    | Hannchen  | 10                             | 33                | 30     |
| 14    | Uh362 ( <i>MAT-2, Uhavr1</i> ) x Uh1358 = Uh1289 ( <i>MAT-1, ΔUhAvr1</i> [otef: <i>UhAvr1:GFP</i> ])2    | Odessa    | 7                              | 32                | 22     |
| 14    | Uh362 ( <i>MAT-2, Uhavr1</i> ) x Uh1358 = Uh1289 ( <i>MAT-1, ΔUhAvr1</i> [otef: <i>UhAvr1:GFP</i> ])2    | Hannchen  | 5                              | 40                | 13     |
| 15    | Uh362 ( <i>MAT-2, Uhavr1</i> ) x Uh1359 = Uh1289 ( <i>MAT-1, ΔUhAvr1</i> [otef: <i>UhAvr1:GFP</i> ])3    | Odessa    | 13                             | 33                | 39     |
| 15    | Uh362 ( <i>MAT-2, Uhavr1</i> ) x Uh1359 = Uh1289 ( <i>MAT-1, ΔUhAvr1</i> [otef: <i>UhAvr1:GFP</i> ])3    | Hannchen  | 17                             | 39                | 44     |
| 16    | Uh362 ( <i>MAT-2, Uhavr1</i> ) x Uh1361 = Uh1289 ( <i>MAT-1, ΔUhAvr1</i> [HSP70: <i>UhAvr1:HA</i> ])1    | Odessa    | 14, 16                         | 31, 32            | 45, 50 |
| 16    | Uh362 ( <i>MAT-2, Uhavr1</i> ) x Uh1361 = Uh1289 ( <i>MAT-1, ΔUhAvr1</i> [HSP70: <i>UhAvr1:HA</i> ])1    | Hannchen  | 5, 15                          | 33, 36            | 15, 42 |

|    |                                                                                                   |          |       |        |       |
|----|---------------------------------------------------------------------------------------------------|----------|-------|--------|-------|
| 17 | Uh362 ( <i>MAT-2, Uhavr1</i> ) x Uh1362 = Uh1289 ( <i>MAT-1, ΔUhAvr1 [HSP70:UhAvr1:HA]</i> )2     | Odessa   | 2, 13 | 29, 31 | 7, 42 |
| 17 | Uh362 ( <i>MAT-2, Uhavr1</i> ) x Uh1362 = Uh1289 ( <i>MAT-1, ΔUhAvr1 [HSP70: UhAvr1:HA]</i> )2    | Hannchen | 1, 5  | 33, 35 | 3, 14 |
| 18 | Uh362 ( <i>MAT-2, Uhavr1</i> ) x Uh1363 = Uh1289 ( <i>MAT-1, ΔUhAvr1 [HSP70:UhAvr1-SP:HA]</i> )1  | Odessa   | 12    | 28     | 43    |
| 18 | Uh362 ( <i>MAT-2, Uhavr1</i> ) x Uh1363 = Uh1289 ( <i>MAT-1, ΔUhAvr1 [HSP70: UhAvr1-SP:HA]</i> )1 | Hannchen | 8     | 31     | 26    |
| 19 | Uh362 ( <i>MAT-2, Uhavr1</i> ) x Uh1369 = Uh1289 ( <i>MAT-1, ΔUhAvr1 [HSP70:UhAvr1]</i> )1        | Odessa   | 11    | 33     | 33    |
| 19 | Uh362 ( <i>MAT-2, Uhavr1</i> ) x Uh1369 = Uh1289 ( <i>MAT-1, ΔUhAvr1 [HSP70: UhAvr1]</i> )1       | Hannchen | 13    | 33     | 39    |
| 20 | Uh362 ( <i>MAT-2, Uhavr1</i> ) x Uh1370 = Uh1289 ( <i>MAT-1, ΔUhAvr1 [HSP70: UhAvr1]</i> )4       | Odessa   | 11    | 36     | 31    |
| 20 | Uh362 ( <i>MAT-2, Uhavr1</i> ) x Uh1370 = Uh1289 ( <i>MAT-1, ΔUhAvr1 [HSP70: UhAvr1]</i> )4       | Hannchen | 12    | 35     | 34    |
| 21 | Uh362 ( <i>MAT-2, Uhavr1</i> ) x Uh1371 = Uh1289 ( <i>MAT-1, ΔUhAvr1 [HSP70: UhAvr1]</i> )9       | Odessa   | 7     | 30     | 23    |
| 21 | Uh362 ( <i>MAT-2, Uhavr1</i> ) x Uh1371 = Uh1289 ( <i>MAT-1, ΔUhAvr1 [HSP70: UhAvr1]</i> )9       | Hannchen | 12    | 31     | 33    |

<sup>1</sup> For descriptions of strains and deletion mutants, see Table S2. Complementing plasmid constructs are given between square brackets, expressing the corresponding gene chimer (either linked to GFP or the HA epitope tag) from either the *otef* or *U. maydis* HSP70 promoter. –SP indicates the effector gene is lacking the predicted signal peptide sequence.

<sup>2</sup> Pathogenicity tests are variable; ratings for the same cross should be compared with respect to infection on universal suscept ‘Odessa’
