# Supplementary material for: An Immunity-Triggering Effector from the Barley Smut Fungus Ustilago hordei Resides in an Ustilaginaceae-Specific Cluster Bearing Signs of Transposable Element-Assisted Evolution
Source: PubMed Central journal article supplement (PMC4081816; doi:10.1371/journal.ppat.1004223), 2014-07-03
Supplement: ppat.1004223.s014.pdf [file ppat.1004223.s014.pdf]

**Table S4. Primers used in this work**

| #    | Name of the primer              | Sequence                                           | Purpose                              |
|------|---------------------------------|----------------------------------------------------|--------------------------------------|
| 661  | Uh5311R2                        | GCATTCGGCCTGATACCAAC                               | Sequencing of UHOR_08132             |
| 727  | Uh05318homo_r                   | GCGCACTAGTTCAATTCAAAGCTGGAGGTATG                   | Sequencing of UHOR_10033             |
| 728  | Uh05294plus_f                   | GGAAGTGTGCTCTGGTAGTGG                              | Sequencing of UHOR_10021             |
| 730  | Uh05306plus_f                   | ATAGCCCTCCTTCATGGTGT                               | Sequencing of UHOR_08128             |
| 731  | Uh05306plus_r                   | TCGCAGTGCCTTTCATATTG                               | Sequencing of UHOR_08128             |
| 736  | Uh05311aPlus_f                  | GCTTTTCATCAGAGCCATACCT                             | Sequencing of UHOR_08130             |
| 737  | Uh05311aPlus_r                  | TGGCTTGTTTACAGAGTGCAA                              | Sequencing of UHOR_08130             |
| 966  | 5319 plus_r                     | TCTCCCTTCCTCGTCAACCTG                              | Sequencing of UHOR_10033             |
| 1012 | <i>UHOR_08134</i> nested_f      | TGAAGGCGCGCCATGTCAGAGGAAGCGAG                      | To generate deletion construct       |
| 1035 | <i>UHOR_08134</i> 5'-flank_f    | GGTACGCCGATCACTTCAAC                               | 5F of deletion construct             |
| 1038 | Hyg- <i>UHOR_08134</i> 5'-flank | ATAATCCTTAAAAACTCCATTTCCACCCCTGTAGACAGATGTACCTTCAT | 5F of deletion construct             |
| 1221 | Hyg- <i>UHOR_08134</i> 3'-flank | ACTTTATTGTCATAGTTTAGATCTATTTTGACTCCTGTGACCATTCGAGG | 3F of deletion construct             |
| 1222 | <i>UHOR_08134</i> 3'-flank_r    | CCGATACCGAGACAATAGCTG                              | 3F of deletion construct             |
| 1223 | <i>UHOR_08134</i> nested_r      | GTGCATGGTGTGGAGGTC                                 | To generate deletion construct       |
| 1152 | UH_08134_Fw                     | CACCATGAAGGTACATCTGTCTAC                           | Sequencing of UHOR_08134             |
| 1154 | UH_08134_Rev                    | GCCTCGAATGGTCACAGG                                 | Sequencing of UHOR_08134             |
| 1244 | UH_13897_Fw                     | CACCATGCTTACTCAACCGGCCAAC                          | Cloning of UHOR_10021                |
| 1245 | UH_13897-SP_Fw                  | CACCATGGCACTACCCGGTCGCAGCTAC                       | Cloning of UHOR_10021                |
| 1246 | UH_13897_Rev                    | CATTCGTGACAACGTCTCAAAAAC                           | Cloning and sequencing of UHOR_10021 |
| 1247 | UH_10022_Fw                     | CACCATGCGATCGTTTTCCCTTTTCC                         | Cloning and sequencing of UHOR_10022 |
| 1248 | UH_10022-SP_Fw                  | CACCATGCCTGGCGACAAAGCTTCTTC                        | Cloning of UHOR_10022                |
| 1249 | UH_10022_Rev                    | TCCGGCAAATCGGAGCGCAG                               | Cloning and sequencing of UHOR_10022 |
| 1253 | UH_08132_Fw                     | CACCATGGCCACAACATCACTCTTAC                         | Sequencing of Uh08132                |
| 1256 | UH_08128_Fw                     | CACCATGCTTTTCTTTATTCTCGCC                          | Sequencing of UHOR_08128             |
| 1258 | UH_08128_Rev                    | AGAAAAGTGCGGCAGTGATGC                              | Sequencing of UHOR_08128             |
| 1261 | UH_08127_Rev                    | TCCGTGGCCTCTAACAGCAAG                              | Sequencing of UHOR_08127             |
| 1265 | UH_08139_Fw                     | CACCATGTTCCGAATCGGCTTTGTGTC                        | Sequencing of UHOR_08139             |

| #    | Name of the primer    | Sequence                                                   | Purpose                                 |
|------|-----------------------|------------------------------------------------------------|-----------------------------------------|
| 1267 | UH_08139_Rev          | TCCAGGCAATCTGATCAGGC                                       | Sequencing of UHOR_08139                |
| 1272 | Uh08127-plusL         | GCAGAGCATGACGTGAAACTAC                                     | Sequencing of UHOR_08127                |
| 1273 | Uh08127-plusR         | GTTCAAGGCCCTATATCCCTCT                                     | Sequencing of UHOR_08127                |
| 1277 | Uh10024-plusL         | TGAGATCTGTCATAGAGCTGTTTC                                   | Sequencing of UHOR_10024                |
| 1278 | Uh10024-plusR         | GCATCTTCGGATGTCAGGTAGT                                     | Sequencing of UHOR_10024                |
| 1281 | Uh08132-plus-L        | CGCTATGGAAGCACTTCATTTT                                     | Sequencing of UHOR_08132                |
| 1282 | Uh10033-plus-L        | GGTCAAGTCGACCTCCAACAG                                      | Sequencing of UHOR_13916                |
| 1283 | Uh10033-plus-R        | GTCCCTTCCGTCACCTCCAT                                       | Sequencing of UHOR_13916                |
| 1284 | C19-A1-5L-1Sce-1F     | <u>AAAATAGGGATAACAGGGTAAT</u> CGACAGATCTCGAGGAAACC         | 5F of deletion construct C18A2          |
| 1285 | C19-A1-5R-flank-attB1 | <u>GGGGACAAGTTTGTACAAAAAAGCAGGCTATTGAATTGTTTGCCACACCTG</u> | 5F deletion construct C18A2             |
| 1286 | C19-A1-ko-5 FlankL    | TCACTTCAGGAGGTGATCAAGA                                     | Confirmation of deletion mutant C18A2   |
| 1289 | C19-A2-3L- attB2      | <u>GGGGACCACTTTGTACAAGAAAGCTGGGTAGGAGAGAAGAAGCAGAGCT</u>   | 3F of deletion construct C18A2          |
| 1290 | C19-A2-3R-1Sce-1R     | <u>AAAAATTACCCTGTTATCCCTA</u> TTGTGCTTCACTGCACCTTC         | 3F of deletion construct C18A2          |
| 1291 | C19-A2-ko-3 FlankR    | TCCCTGTTCGGTGTCTTCTTACT                                    | Confirmation of deletion mutant C18A2   |
| 1292 | C19-A3-5L-1sce-1F     | <u>AAAATAGGGATAACAGGGTAAT</u> CCTGTTCGATTGCTAGGAAGG        | 5F deletion construct C18A3             |
| 1293 | C19-A3-5R-attB1       | <u>GGGGACAAGTTTGTACAAAAAAGCAGGCTATTGAGGGTCAATCGGAGAGAT</u> | 5F deletion construct C18A3             |
| 1294 | C19-A3-ko-5 FlankL    | TTGTTGTCTTGGTTTCCTGTGT                                     | Confirmation of deletion mutant C18A2-A |
| 1295 | C19-A4-5L-1Sce-1F     | <u>AAAATAGGGATAACAGGGTAAT</u> AAGCCCTGCTTCTTCTCTCC         | 3F of deletion construct C18A3          |
| 1296 | C19-A4-5R-attB1       | <u>GGGGACAAGTTTGTACAAAAAAGCAGGCTATGAGTGGATCCCCATTGTCAT</u> | 3F of deletion construct C18A3          |
| 1297 | C19-A4-ko-5 FlankL    | AGCTTGCAGTCTGTTTCATCATC                                    | Confirmation of deletion mutant C18A5   |
| 1298 | C19-A4-3L attB2       | <u>GGGGACCACTTTGTACAAGAAAGCTGGGTACGTACAGGACCGTGAGGACT</u>  | 5F deletion construct C18A4             |
| 1299 | C19-A4-3R-1Sce-1-R    | <u>AAAAATTACCCTGTTATCCCTA</u> GTGGATCAGCTGTTCACTCG         | 5F deletion construct C18A4             |
| 1428 | C19A2-A-3F-attB2-L    | <u>GGGGACCACTTTGTACAAGAAAGCTGGGTAGCATTGTGCTCAAGCTGTGT</u>  | 3F deletion construct C18A-A            |
| 1429 | C19A2-A-3F-1sce1R-R   | <u>AAAAATTACCCTGTTATCCCTA</u> ACTGCTGGGCAAGAATGACT         | 3F deletion construct C18A-A            |
| 1430 | C19A2-b-5F-1sce1F-L   | <u>AAAATAGGGATAACAGGGTAAT</u> CTCAAACCCAATCTGCAGTG         | 5F deletion construct C18A-B            |
| 1431 | C19A2-b-5F-attB1-R    | <u>GGGGACAAGTTTGTACAAAAAAGCAGGCTATAGGTTAGCGGTCCAGATCAA</u> | 5F deletion construct C18A-B            |
| 1432 | C19A2-b-3F-attB2-L    | <u>GGGGACCACTTTGTACAAGAAAGCTGGGTACTAGGACGAAACAGCCAAGC</u>  | 3F deletion construct C18A-B            |
| 1433 | C19A2-b-3F-1SceR-R    | <u>AAAAATTACCCTGTTATCCCTA</u> ACTCCAATCACGGGAATCAC         | 3F deletion construct C18A-B            |
| 1434 | C19A2-c-5F-1sce1F-L   | <u>AAAATAGGGATAACAGGGTAAT</u> TGGGTAGAGGTTTGGTGAGG         | 5F deletion construct C18A-C            |
| 1435 | C19A2-c-5F-attB1-R    | <u>GGGGACAAGTTTGTACAAAAAAGCAGGCTATAAGAATCCTGCCTTGCTTCA</u> | 5F deletion construct C18A-C            |

| #    | Name of the primer  | Sequence                                                   | Purpose                                 |
|------|---------------------|------------------------------------------------------------|-----------------------------------------|
| 1436 | C19A2-c-3F-attB2-L  | <b>GGGGACCACTTTGTACAAGAAAGCTGGGTACCTTAGCCTAGTCCCGCTCT</b>  | 3F deletion construct C18A-C            |
| 1437 | C19A2-c-3F-1SceR-R  | <b><u>AAAAATTACCCTGTTATCCCTA</u>GAGAAGAAGCAGGGCTTTCA</b>   | 3F deletion construct C18A-C            |
| 1438 | C19A2-d-5F-1sce1F-L | <b><u>AAAATAGGGATAACAGGGTAAT</u>TTTCATCTTCGCCATTCTTC</b>   | 5F deletion construct C18A-D            |
| 1439 | C19A2-d-5F-attB1-R  | <b>GGGGACAAGTTTGTACAAAAAAGCAGGCTATTTGAAGCTCCTCGTCAGACA</b> | 5F deletion construct C18A-D            |
| 1440 | C19A2-d-3F-attB2-L  | <b>GGGGACCACTTTGTACAAGAAAGCTGGGTACATCATCATAGGCTGAGTGGA</b> | 3F deletion construct C18A-D            |
| 1441 | C19A2-d-3F-1SceR-R  | <b><u>AAAAATTACCCTGTTATCCCTA</u>GGCAAGCTTTGACTTGGAAT</b>   | 3F deletion construct C18A-D            |
| 1446 | C19A2-e-3F-attB2-L  | <b>GGGGACCACTTTGTACAAGAAAGCTGGGTAGAGACGATCGTGCGTATGTG</b>  | 3F deletion construct C18A-E            |
| 1447 | C19A2-e-3F-1SceR-R  | <b><u>AAAAATTACCCTGTTATCCCTA</u>TTCACTGCGATCTGCCATAG</b>   | 3F deletion construct C18A-E            |
| 1506 | C19A2-A-KO-3F       | TTACAATTGCAGGCAACCAG                                       | Confirmation of deletion mutant C18A2-A |
| 1507 | C19A2-B-KO-5F       | GCATATGGCTTCTTGCCATT                                       | Confirmation of deletion mutant C18A2-B |
| 1508 | C19A2-D-KO-3F       | TGTCATACAGCCCCAGATCA                                       | Confirmation of deletion mutant C18A2-D |
| 1511 | Uh13899-L           | CGTTTGACAAGGACGACAGA                                       | For PCR amplification                   |
| 1513 | VirC17R1            | CTGCAGGTGACTCTAGAGG                                        | For PCR of transposable element         |
| 1551 | C19A2-E-ko-3F       | TGATGCTCATGCTGATTTCA                                       | Confirmation of deletion mutant C18A2-D |
| 1614 | Uh10022-5F-attBI    | <b>GGGGACAAGTTTGTACAAAAAAGCAGGCTATAGGTTAGTGGTCAGTTTATC</b> | 5F deletion construct UHOR_10022        |
| 1615 | Uh10022F            | CACCGTGACCATGGATTCGTCT                                     | for RNAi                                |
| 1668 | 10026F              | TGTCGGTTGTTGGTCTTCCC                                       | For PCR amplification                   |
| 1669 | 10027R              | TGATCAACCACATGGGTGCT                                       | For PCR amplification                   |
| 1670 | 10028F              | CCAGTAGCCTGGAAGTCAGC                                       | For PCR amplification                   |
| 1671 | 10028R              | TAGACTTTCGTGCGTTGTGC                                       | For PCR amplification                   |
| 1672 | 13901F              | GAATTTCCGAGTCGATCCAA                                       | For PCR amplification                   |
| 1673 | 10030R              | GCAAGAGGGAGCAACAAGTC                                       | For PCR amplification                   |
| 1685 | 10021F1             | CGATGTAGCGGGTCTCGAAG                                       | For qPCR and PCR amplification          |
| 1689 | 10022 qPCR-L        | GGTGGACACCTGGTCTTAGA                                       | Flanking primer for UhAvr1              |
| 1798 | Avr1249NEST         | CAGGCAGTTCAATATCAAG                                        | Nested primer for UhAvr1                |
| 1799 | Avr1689NEST         | AGATAAAGTTAAAAAAACT                                        | Nested primer for UhAvr1                |
| 1804 | UH07772-5PRIME-B    | AACTTCTGCGCGACACAC                                         | Flanking primer for eIF-B2              |
| 1805 | UH07772-3PRIME-B    | ATACCTGATGACCTCTTCTG                                       | Flanking primer for eIF-B2              |
| 1811 | Avr1804NEST         | CACGCAAAGTACTTTAAG                                         | Nested primer for eIF-B2                |
| 1812 | Avr1805NEST         | CTGCCGCCTTCCTCAACTGC                                       | Nested primer for eIF-B2                |

| #    | Name of the primer | Sequence                            | Purpose                                                         |
|------|--------------------|-------------------------------------|-----------------------------------------------------------------|
| 1815 | 10022SP-ATG-rev    | GGAAAAGGGAAAACGATCGCAT              | For (inverse) PCR amplification                                 |
| 1816 | 10022SP-5start-fw  | CTCTGCATATGGGTCATCGGCG              | For inverse PCR amplification                                   |
| 1890 | Uh362C17R2         | GCCTCCCAATGGGTTTCG                  | For PCR of transposable element                                 |
| 1891 | Uh10026-L58790     | AATGGGACTACAGAGTACAAGG              | For PCR of transposable element                                 |
| 1904 | UhAvr1gene_fw      | CGTGGGATCCTCAGACTGAACACCGGTGCACTGC  | to clone complete wt <i>UhAvr1</i> gene in pUBle3 – BamHI sites |
| 1905 | UhAvr1gene-rev     | CGTCGGATCCATGGTCAAGATCCTTGCGCAGCTCG | to clone complete wt <i>UhAvr1</i> gene in pUBle3 – BamHI sites |

#, primer inventory number. F, forward; R, reverse. 3F and 5F indicates primers were used for the amplification of 3'- and 5'-ends of deleted regions. The I-SceI recognition sequence is in bold type and underlined, while only bold type represents the *attB1* and *attB2* sequences on the primers used for the deletion constructs. The tetranucleotide CACC in bold type indicates the sequence used for directional cloning in the pENTR/D<sup>TM</sup> Gateway plasmid (Invitrogen).
