# Supplementary material for: An Immunity-Triggering Effector from the Barley Smut Fungus Ustilago hordei Resides in an Ustilaginaceae-Specific Cluster Bearing Signs of Transposable Element-Assisted Evolution
Source: PubMed Central journal article supplement (PMC4081816; doi:10.1371/journal.ppat.1004223), 2014-07-03
Supplement: ppat.1004223.s015.pdf [file ppat.1004223.s015.pdf]

**Table S5. Annotated genes in the region of the *U. maydis* 19A cluster.**

| Number <sup>1</sup> | <i>U. maydis</i><br>MIPS ID <sup>2</sup> | <i>U. maydis</i> ,<br>alternate<br>MIPS ID <sup>2</sup> | Coordinates on chrom 19 |        | Function <sup>3</sup>                              |
|---------------------|------------------------------------------|---------------------------------------------------------|-------------------------|--------|----------------------------------------------------|
| 1                   | um10705                                  | um05289                                                 | 131692                  | 132810 | cyclin-dependent kinase 1                          |
| 2                   | um05290                                  |                                                         | 134828                  | 133131 | putative protein                                   |
| 3                   | um05291                                  | umd191-470                                              | 136367                  | 135366 | conserved hypothetical protein                     |
| 4                   | um05292                                  |                                                         | 137169                  | 141062 | related to DigA protein                            |
| 5                   | um05293                                  |                                                         | 142124                  | 144523 | probable oligosaccharyltransferase                 |
| 6                   | <b>um05294</b>                           |                                                         | 145921                  | 146535 | conserved hypothetical Ustilago-specific protein * |
| 7                   | <b>um05295</b>                           |                                                         | 147006                  | 147635 | conserved hypothetical Ustilago-specific protein * |
| 8                   | <b>um12302</b>                           | <b>um05296</b>                                          | 148362                  | 148916 | conserved hypothetical Ustilago-specific protein * |
| 9                   | <b>um10553</b>                           | <b>um05297</b>                                          | 150051                  | 150695 | conserved hypothetical Ustilago-specific protein * |
| 10                  | <b>um10554</b>                           | <b>um05298</b>                                          | 151334                  | 151915 | conserved hypothetical Ustilago-specific protein * |
| 11                  | <b>um05299</b>                           |                                                         | 153386                  | 154090 | conserved hypothetical Ustilago-specific protein * |
| 12                  | <b>um05300</b>                           |                                                         | 154615                  | 155271 | conserved hypothetical Ustilago-specific protein * |
| 13                  | <b>um05301</b>                           |                                                         | 156973                  | 157728 | conserved hypothetical Ustilago-specific protein * |
| 14                  | <b>um05302</b>                           |                                                         | 159396                  | 160019 | hypothetical protein *                             |
| 15                  | <b>um05303</b>                           |                                                         | 160415                  | 160996 | hypothetical protein *                             |
| 16                  | <b>um10555</b>                           | <b>um05304</b>                                          | 161948                  | 162550 | conserved hypothetical protein *                   |
| 17                  | <b>um05305</b>                           |                                                         | 164040                  | 164723 | conserved hypothetical Ustilago-specific protein * |
| 18                  | <b>um05306</b>                           |                                                         | 165279                  | 166142 | conserved hypothetical Ustilago-specific protein * |
| 19                  | <b>um10556</b>                           | <b>um05307</b>                                          | 167168                  | 166284 | hypothetical protein *                             |
| 20                  | <b>um05308</b>                           |                                                         | 169924                  | 170652 | hypothetical protein *                             |
| 21                  | <b>um05309</b>                           |                                                         | 173231                  | 173818 | conserved hypothetical Ustilago-specific protein * |

|    |         |            |        |        |                                                              |
|----|---------|------------|--------|--------|--------------------------------------------------------------|
| 22 | um05310 |            | 174557 | 175144 | conserved hypothetical Ustilago-specific protein *           |
| 23 | um05311 |            | 176039 | 176701 | conserved hypothetical Ustilago-specific protein *           |
| 24 | um05312 |            | 177055 | 177603 | conserved hypothetical Ustilago-specific protein *           |
| 25 | um05313 |            | 178662 | 180186 | hypothetical protein                                         |
| 26 | um05314 |            | 181718 | 182314 | conserved hypothetical Ustilago-specific protein *           |
| 27 | um10557 | um05315    | 183874 | 184416 | conserved hypothetical Ustilago-specific protein *           |
| 28 | um05316 | umd191-730 | 184994 | 185813 | related to transposase, pseudogene                           |
| 29 | um05317 |            | 186566 | 187102 | conserved hypothetical Ustilago-specific protein *           |
| 30 | um05318 |            | 187537 | 188088 | hypothetical protein *                                       |
| 31 | um05319 |            | 188591 | 189148 | conserved hypothetical Ustilago-specific protein *           |
| 32 | um10558 | um05320    | 189722 | 191330 | probable tubulin beta chain                                  |
| 33 | um10559 | um05321    | 194157 | 191683 | conserved hypothetical protein                               |
| 34 | um05322 |            | 196067 | 195681 | hypothetical protein                                         |
| 35 | um10560 | um05323    | 196939 | 198717 | conserved hypothetical protein                               |
| 36 | um10561 | um05324    | 200035 | 204555 | related to VPS10 domain-containing receptor SorCS1 precursor |
| 37 | um05325 |            | 207057 | 209936 | conserved hypothetical protein                               |
| 38 | um05326 |            | 211663 | 217938 | conserved hypothetical protein                               |

<sup>1</sup> Number corresponds to predicted *U. maydis* genes in Figure 4

<sup>2</sup> MIPS *U. maydis* Database gene ID number available at <http://mips.helmholtz-muenchen.de/genre/proj/ustilago/>; color indicates homology / likely family members, and corresponds to Figure 4

<sup>3</sup> annotated function of *U. maydis* gene; the 24 predicted SSPs are indicated with an asterisk [26]
